# Supplementary material
Source: Springer Nature journal article supplement (https://www.springermedizin.de/resource/supplementary/12889_2014_7018_MOESM2_ESM.pdf/9499616)
Supplement: MOESM2 [file 9499616]

**Figure 1: Sampling and participant selection**

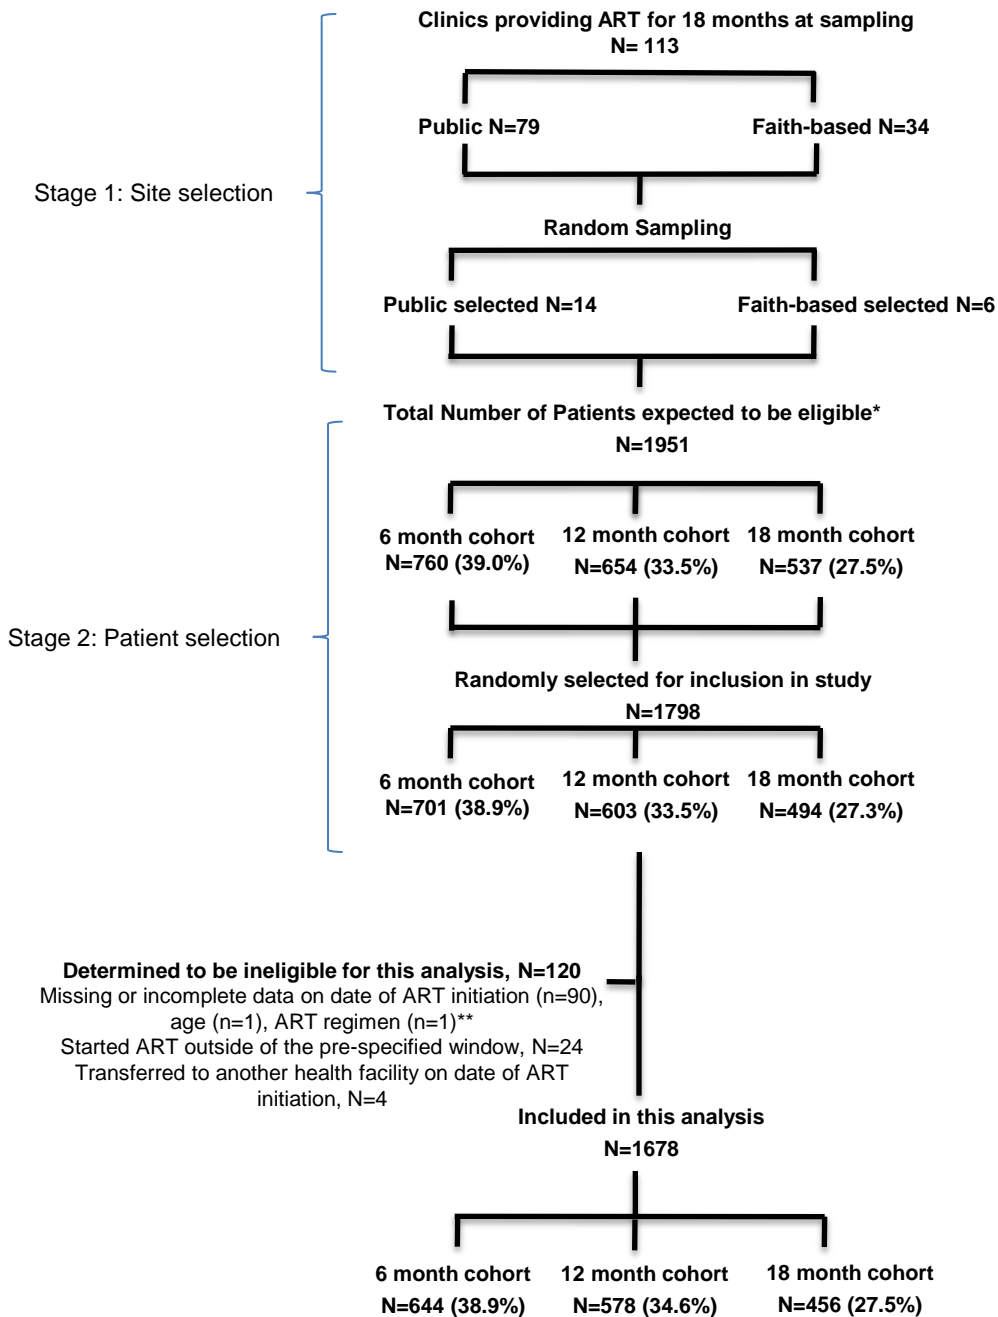

\* Data obtained from TRACNet, the national monitoring and evaluation system at national level

\*\* Data not found in clinic records at the time of data abstraction
